# Supplementary material for: Facile synthesis of well-dispersed CeO2–CuOx composite hollow spheres with superior catalytic activity for CO oxidation
Source: Royal Society of Chemistry journal article supplement (doi:10.1039/c5ra16410a), 2015-01-01
Supplement: c5ra16410a1.pdf [file c5ra16410a1.pdf]

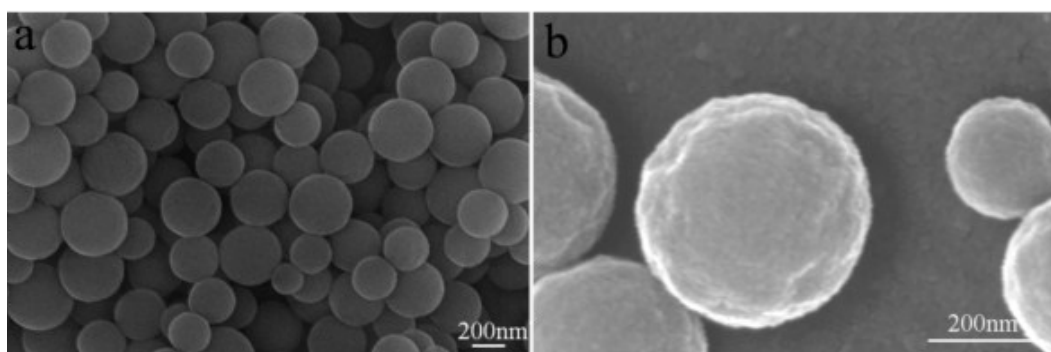

Figure.S1.SEM images of carbon spheres.

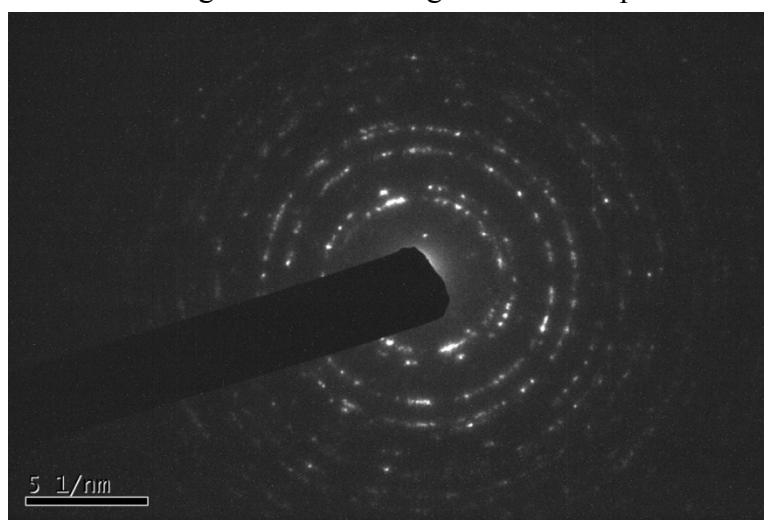

Figure.S2.SEAD patterns of 10%CuO<sub>x</sub>-CeO<sub>2</sub> composite hollow spheres

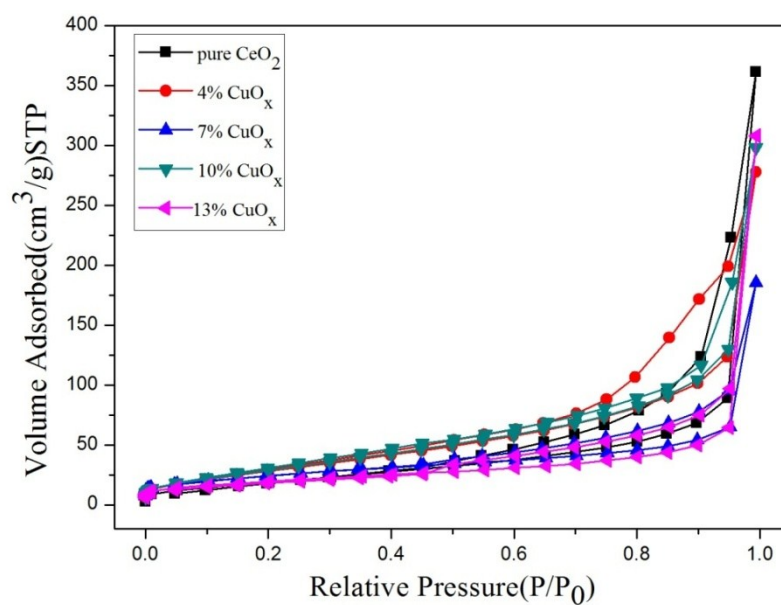

Figure.S3.N<sub>2</sub> adsorption-desorption isotherms of CuO<sub>x</sub>-CeO<sub>2</sub> composite hollow sphere
